# Supplementary material
Source: ML conference proceedings conference paper supplement (https://www.ecva.net/papers/eccv_2022/papers_ECCV/html/136760645_ECCV_2022_paper.php)
Supplement: Supplementary file 1 [file 136760645-supp.pdf]

# Supplementary Material for “Unbiased Multi-Modality Guidance for Image Inpainting”

Yongsheng Yu<sup>1,3</sup>, Dawei Du<sup>2</sup>, Libo Zhang<sup>1,3,4</sup>, and Tiejian Luo<sup>3</sup>

<sup>1</sup> Institute of Software Chinese Academy of Sciences, China

<sup>2</sup> Kitware, USA

<sup>3</sup> University of Chinese Academy of Sciences, China

<sup>4</sup> Nanjing Institute of Software Technology, China

yuyongsheng19@mails.ucas.ac.cn; cvdaviddo@gmail.com; libo@iscas.ac.cn;  
tjluo@ucas.ac.cn

## 1 Implementation Details

In this work, the layers of adaptive contextual bottlenecks in the encoder are set to  $L = 8$ , where the dilation rates of convolutions in each bottleneck are empirically set to  $r \in R = \{1, 2, 3, 4\}$ . In multi-scale spatial-aware attention, the patch size is set to  $h = w = \{2, 4\}$ . We use  $\lambda_{\text{edge}} = 0.1$ ,  $\lambda_{\text{seg}} = 0.5$  for the overall loss in Eq. 3. The weight of edge loss in Eq. 4 is empirically set to  $w_1 = 5.0$ .

We train our model with batch size of 20 using the Adam optimizer. We first use an initial learning rate of  $2e - 4$  and  $1e - 5$  and then  $5e - 5$  and  $1e - 6$  to train the main network and edge discriminator respectively. Following [6, 5], we scale the image size of all datasets to  $256 \times 256$  as the input.

## 2 Visual Results

In this section, we compare our method with state-of-the arts on four large-scale datasets, i.e., CelebA-HQ dataset [3, 4], Outdoor dataset (OST) [8], and Cityscapes dataset [1].

### 2.1 Qualitative Facial Inpainted Results

Compared with the baselines (GC [9], CMGAN [10], ICT [7] and CTSDG [2]), the inpainted results of faces with various races are illustrated in Figure 1. In the first case (the black male with a square mask), GC [9] can only emerge blurred face outlines, and recent methods such as CMGAN [10], ICT [7] are still hard to generate complete face, while CTSDG [2] results in ripples that affect fidelity. In the second case (the white female with free-form masks), all baselines cannot repair the right eyebrow or lips, which our method restores symmetrically and reasonably. Similarly, only our method produces a harmonious eye shape in the third case (the Asian female with free-form masks). In addition, as shown in Figure 2, more facial cases demonstrate that our method can reconstruct images with semantically consistent and reasonable patches.

## 2.2 Qualitative Scene Inpainted Results

We provide some scene inpainted results in Figure 3 and 4 respectively. It indicates that our method can achieve state-of-the-art performance in various complex scenarios.

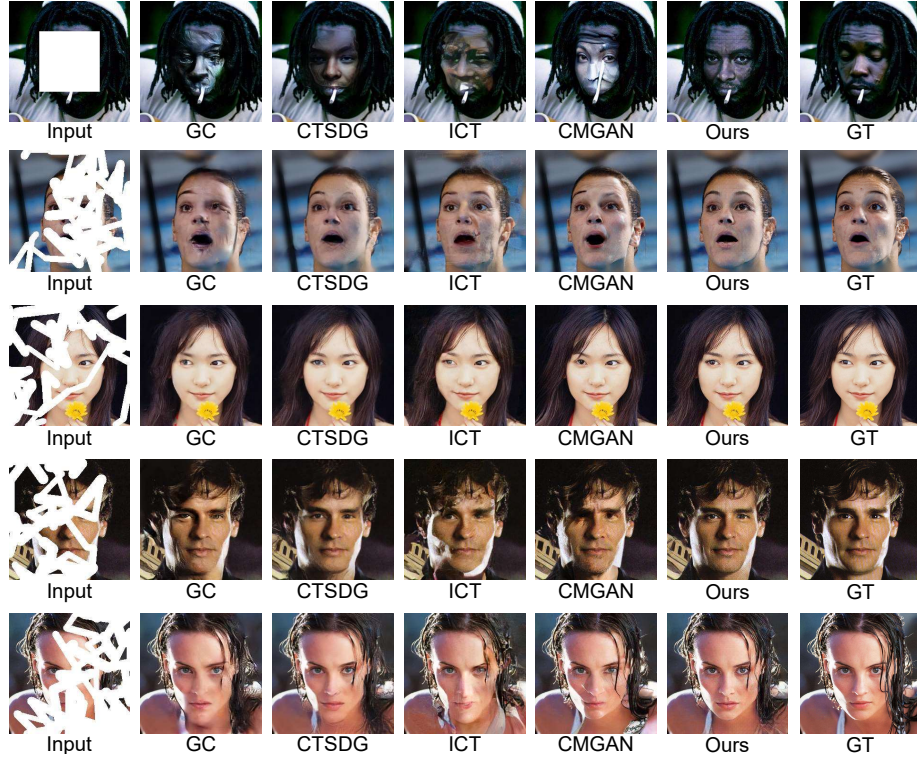

Fig. 1. Qualitative comparison results on the CelebA-HQ dataset.

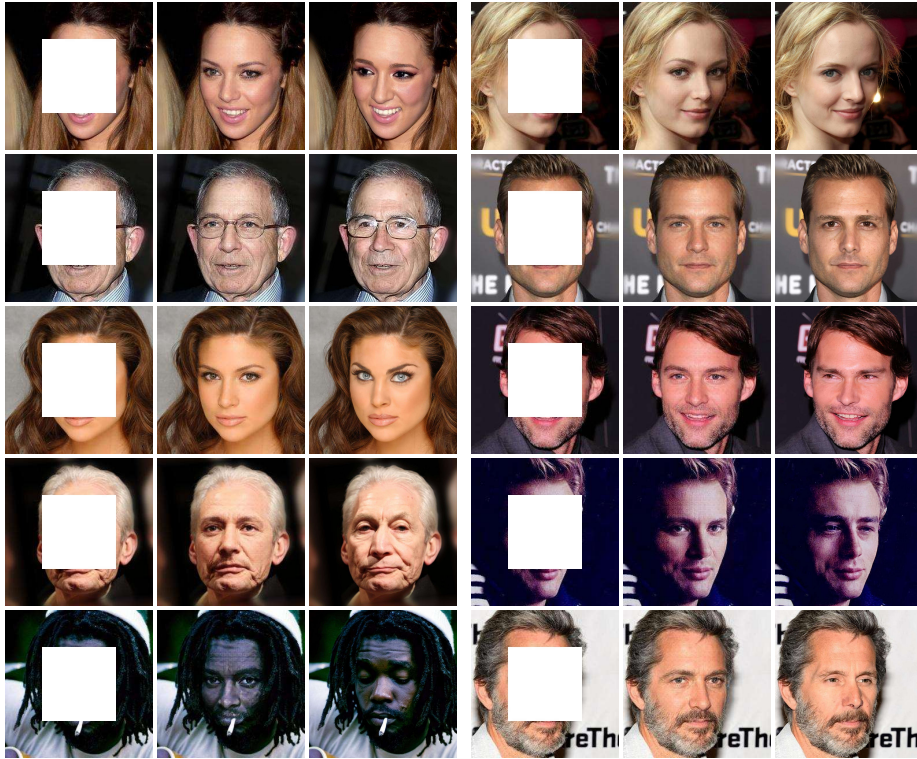

**Fig. 2.** Visual results on the CelebA-HQ dataset. From left to right are masked image, ours, and Ground Truth.

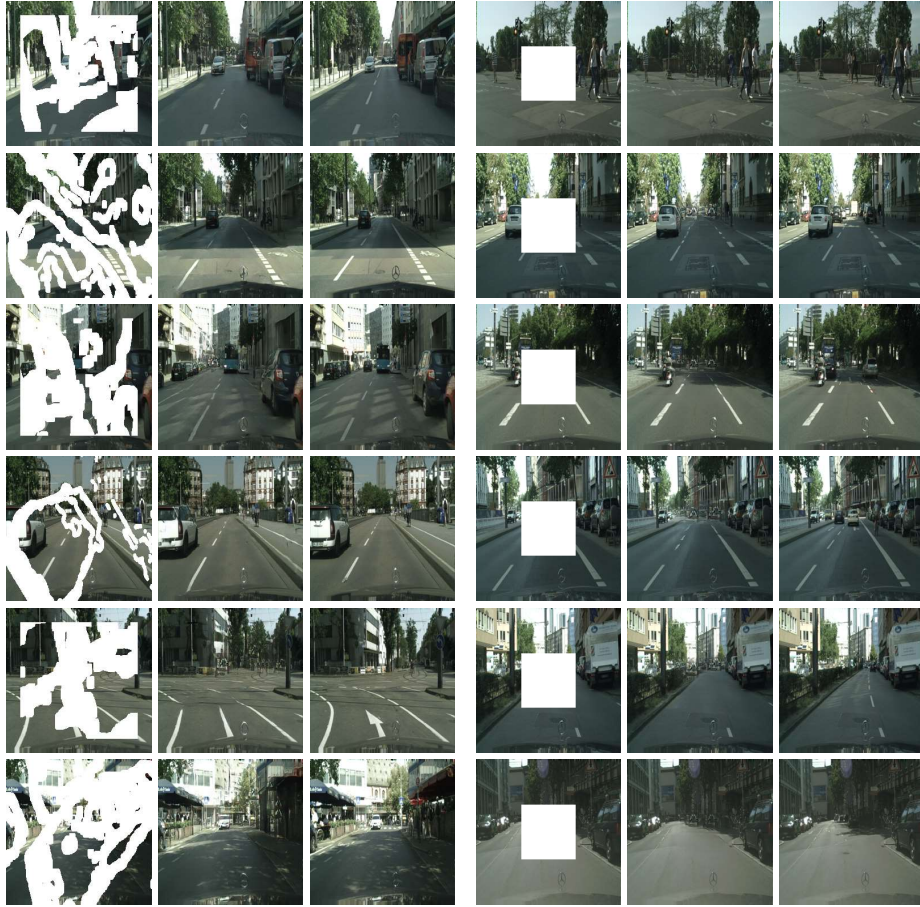

**Fig. 3.** Visual results on CityScape dataset. From left to right are masked image, ours, and Ground Truth.

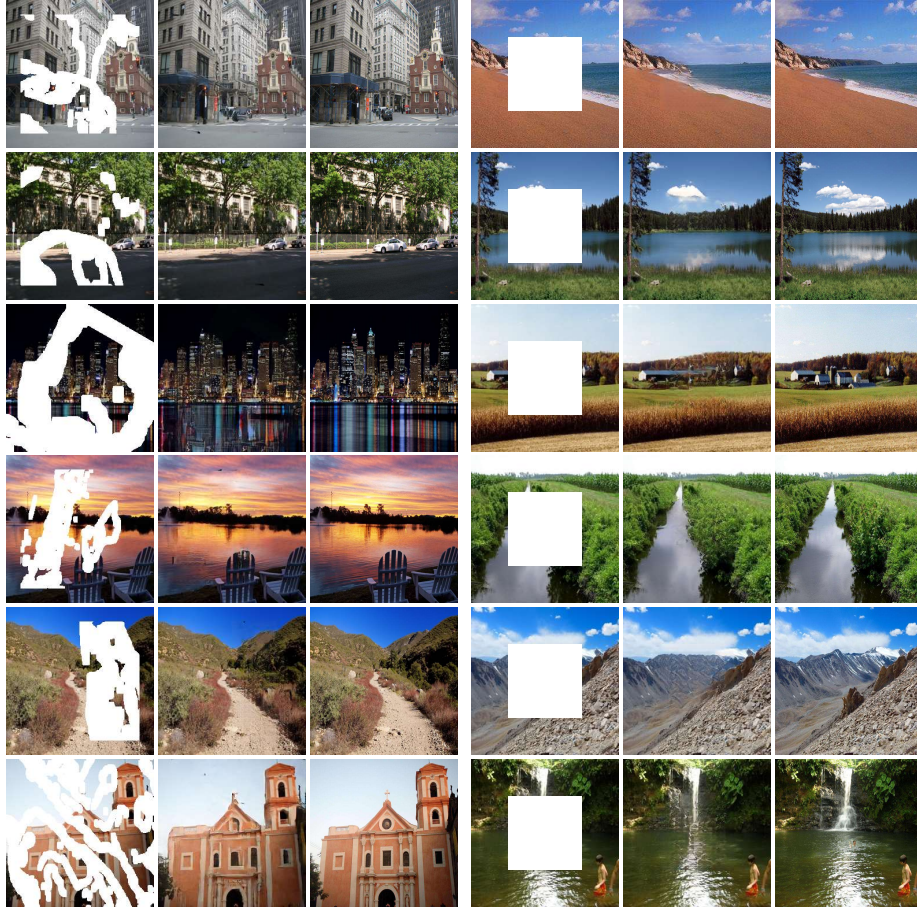

**Fig. 4.** Visual results on OST dataset. From left to right are masked image, ours, and Ground Truth.



## References

1. Cordts, M., Omran, M., Ramos, S., Rehfeld, T., Enzweiler, M., Benenson, R., Franke, U., Roth, S., Schiele, B.: The cityscapes dataset for semantic urban scene understanding. In: CVPR. pp. 3213–3223 (2016)
2. Guo, X., Yang, H., Huang, D.: Image inpainting via conditional texture and structure dual generation. In: ICCV. pp. 14114–14123 (2021)
3. Karras, T., Aila, T., Laine, S., Lehtinen, J.: Progressive growing of gans for improved quality, stability, and variation. In: ICLR (2018)
4. Lee, C., Liu, Z., Wu, L., Luo, P.: Maskgan: Towards diverse and interactive facial image manipulation. In: CVPR. pp. 5548–5557 (2020)
5. Li, J., Wang, N., Zhang, L., Du, B., Tao, D.: Recurrent feature reasoning for image inpainting. In: CVPR. pp. 7757–7765 (2020)
6. Liao, L., Xiao, J., Wang, Z., Lin, C., Satoh, S.: Guidance and evaluation: Semantic-aware image inpainting for mixed scenes. In: ECCV. pp. 683–700 (2020)
7. Wan, Z., Zhang, J., Chen, D., Liao, J.: High-fidelity pluralistic image completion with transformers. In: ICCV. pp. 4672–4681 (2021)
8. Wang, X., Yu, K., Dong, C., Loy, C.C.: Recovering realistic texture in image super-resolution by deep spatial feature transform. In: CVPR. pp. 606–615 (2018)
9. Yu, J., Lin, Z., Yang, J., Shen, X., Lu, X., Huang, T.S.: Free-form image inpainting with gated convolution. In: ICCV. pp. 4470–4479 (2019)
10. Zhao, S., Cui, J., Sheng, Y., Dong, Y., Liang, X., Chang, E.I., Xu, Y.: Large scale image completion via co-modulated generative adversarial networks. In: ICLR (2021)
